# Supplementary material
Source: PubMed Central journal article supplement (PMC5306410)

**Suppl. Fig. 2 | Oncofertility Consortium Vitrification Kit Use**

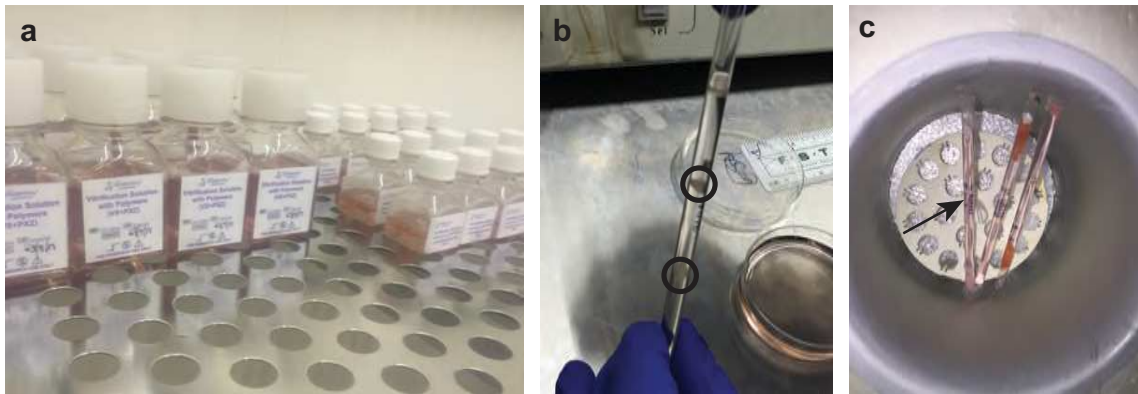

Supplement: 10815_2016_846_MOESM2_ESM.pdf [file 10815_2016_846_MOESM2_ESM.pdf]

**Suppl. Fig. 3 | Ovarian Tissue TUNEL Controls**

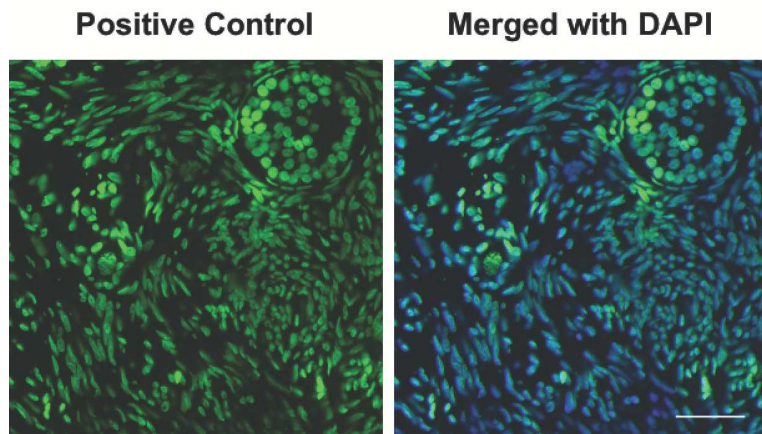

Supplement: 10815_2016_846_MOESM3_ESM.pdf [file 10815_2016_846_MOESM3_ESM.pdf]
